# Supplementary material for: Hierarchical waxberry-like LiNi0.5Mn1.5O4 as an advanced cathode material for lithium-ion batteries with a superior rate capability and long-term cyclability
Source: Royal Society of Chemistry journal article supplement (doi:10.1039/c8ta04572k), 2018-01-01

Electronic supplementary information for

**Hierarchical waxberry-like  $\text{LiNi}_{0.5}\text{Mn}_{1.5}\text{O}_4$  as an advanced cathode material for lithium-ion batteries with superior rate capability and long-term cyclability†**

**Weiwei Sun,<sup>a,\*</sup> Yujie Li,<sup>a</sup> Yumin Liu,<sup>b</sup> Qingpeng Guo,<sup>a</sup> Shiqiang Luo,<sup>a</sup> Jing Yang,<sup>a</sup> Chunman Zheng<sup>a</sup> and Kai Xie<sup>a</sup>**

<sup>a</sup> *College of Aerospace Science and Engineering, National University of Defence Technology, Changsha 410073, Hunan, China.*

<sup>b</sup> *Institute for Interdisciplinary Research (IIR), Jiangnan University, Wuhan 430056, Hubei, China.*

**Figure S1** Raman spectra of the HWL-LNMO.

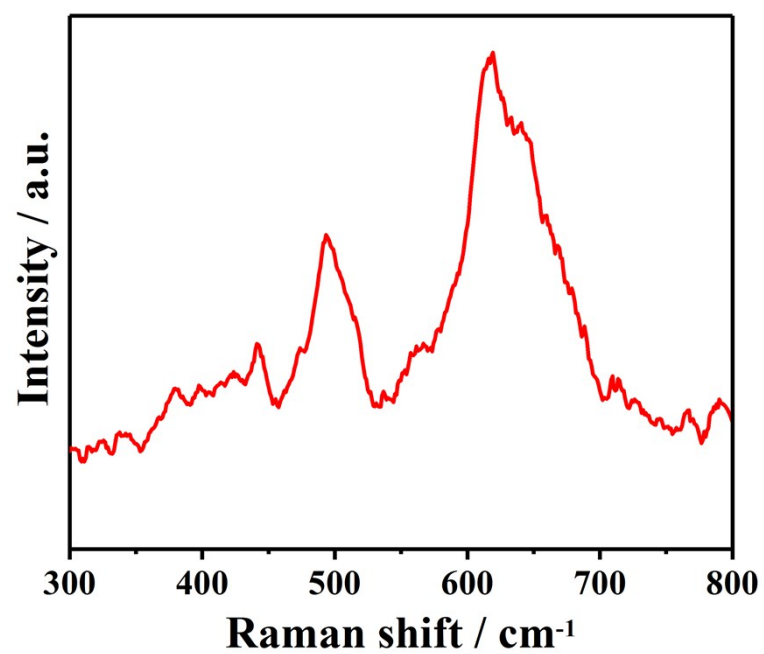

**Figure S2** SEM images of carbonate precursors obtained by solvothermal reaction using (a)  $\text{H}_2\text{O}+\text{HMT}$ , (b) ethanol+HMT, (c) benzyl alcohol+HMT, (d) ethylene glycol+urea.

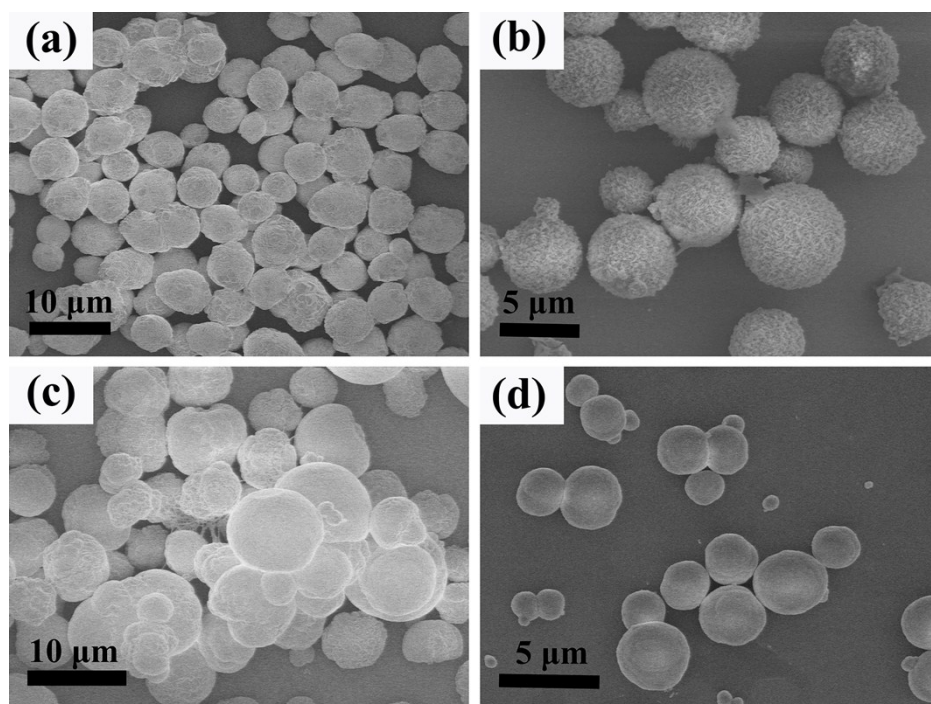

**Figure S3** Cyclic voltammogram of the HWL-LNMO electrode at a scan speed of 0.05 mV s<sup>-1</sup>.

1.

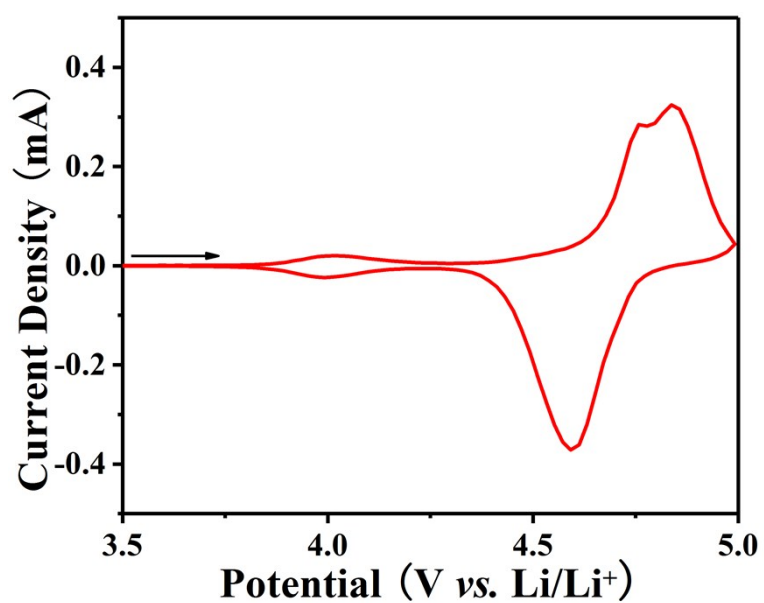

Figure S4 Cycling performance of LNMO prepared from different reaction solvents.

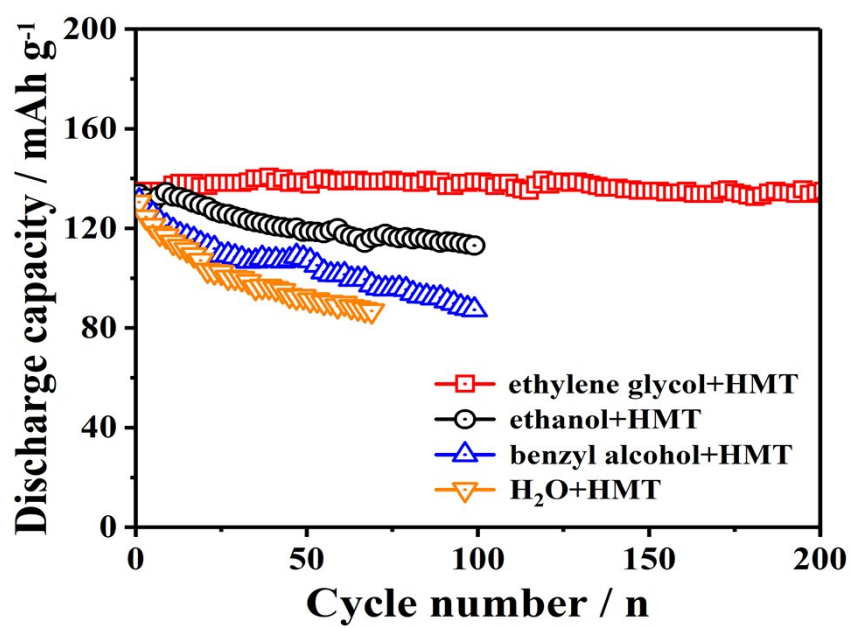

**Figure S5** Discharge curves of HWL-LNMO at different discharge rates of 1 C to 30 C.

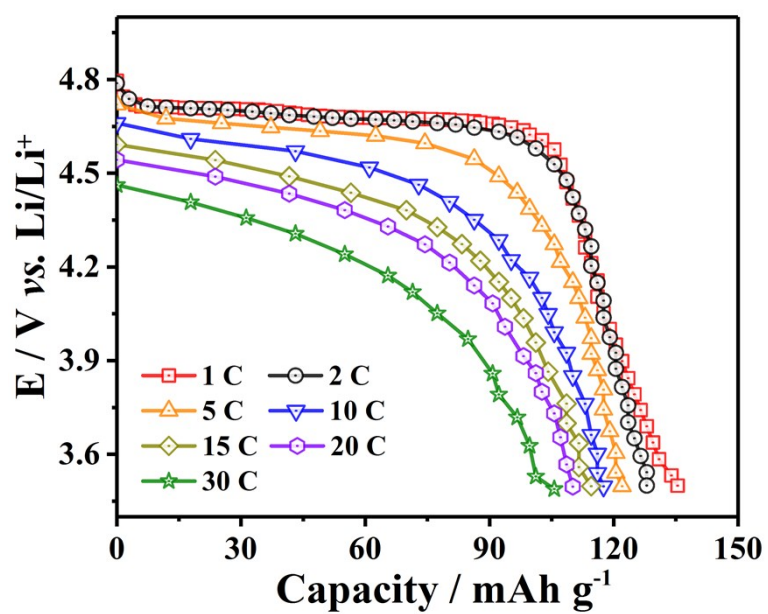

**Figure S6** Comparison of the rate capabilities of HWL-LNMO, LNMO porous sphere,<sup>27</sup> LNMO octahedra,<sup>34</sup> SiO<sub>2</sub>-coated LNMO,<sup>43</sup> Cr-doped LNMO<sup>44</sup> and TiO<sub>2</sub>-coated LNMO<sup>17</sup>.

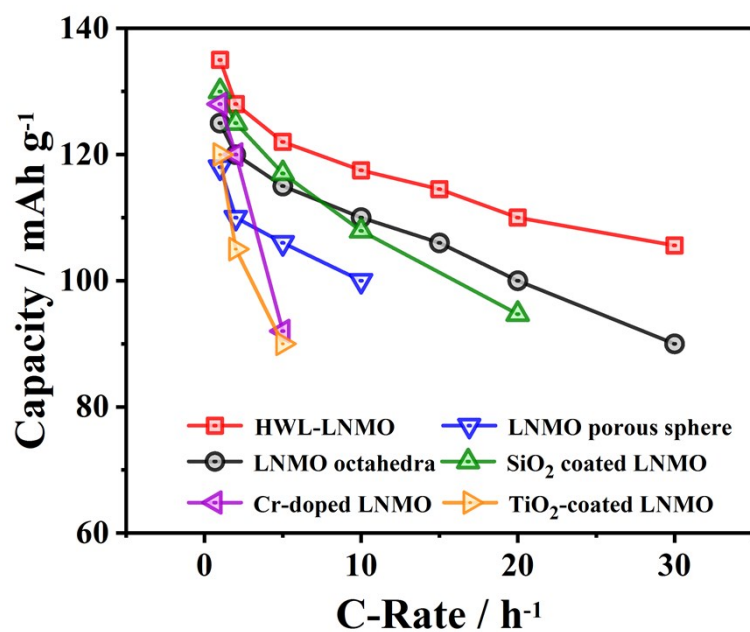

**Table S7** Comparison of the high-rate cycle performances of our HWL-LNMO with other reported  $\text{LiNi}_{0.5}\text{Mn}_{1.5}\text{O}_4$ .

| Cathode materials                  | Strategies                                              | Cycling stability              |
|------------------------------------|---------------------------------------------------------|--------------------------------|
| LNMO porous nanorods               | morphology-inheritance route <sup>18</sup>              | 91% after 500 cycles at 5 C    |
| LNMO with high surface orientation | metal-organic framework method <sup>15</sup>            | 78.7% after 500 cycles at 10 C |
| LNMO particles                     | hydrothermal method <sup>20</sup>                       | 88.1% after 1000 cycles at 5 C |
| LNMO porous ellipsoids             | self-template method <sup>26</sup>                      | 88.4% after 400 cycles at 5 C  |
| Hierarchical LNMO                  | controlling microstructures of precursors <sup>30</sup> | 91.4% after 1000 cycles at 5 C |
| LNMO nanoplates                    | hydrothermal method <sup>36</sup>                       | 84.7% after 500 cycles at 40 C |
| Ours: HWL-LNMO                     | hydrothermal method                                     | 84% after 1200 cycles at 30 C  |



**Figure S8** Electrochemical impedance spectroscopy (EIS) of the HWL-LNMO and SS-LNMO electrodes.

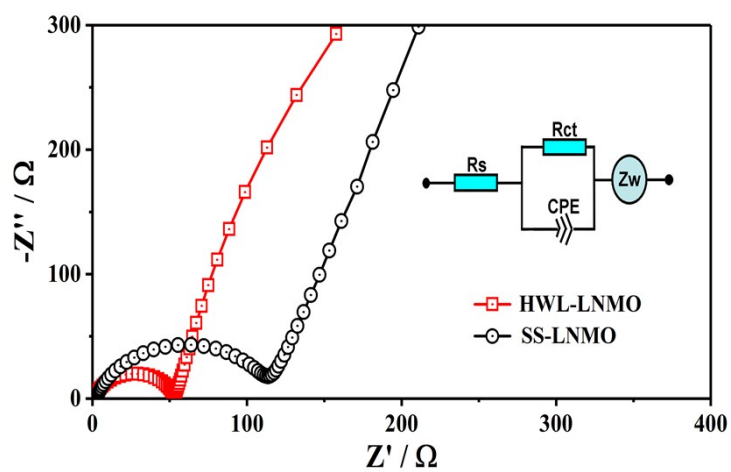

Supplement: c8ta04572k1.pdf [file c8ta04572k1.pdf]
